# Supplementary material for: Identification of a Membrane-Bound Transcriptional Regulator That Links Chitin and Natural Competence in Vibrio cholerae
Source: PubMed Central journal article supplement — mBio. 2014 Jan 28;5(1):e01028-13. doi: 10.1128/mBio.01028-13 (PMC3903286; doi:10.1128/mbio.01028-13), 2014-01-28
Supplement: mbo001141710sf01.pdf [file mbo001141710sf01.pdf]

**Supplementary Figure 1** – *mTn10* transposon fragment used for overexpression

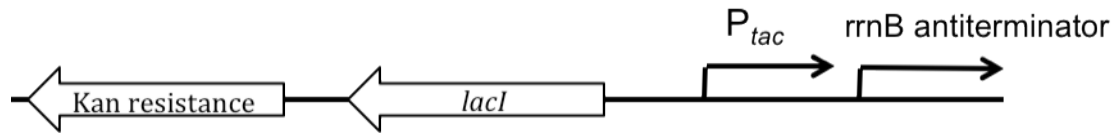

Genetic architecture of the construct used for overexpression of *tfoX* and *qstR* in *V. cholerae*
