# Supplementary material for: Identification of a Membrane-Bound Transcriptional Regulator That Links Chitin and Natural Competence in Vibrio cholerae
Source: PubMed Central journal article supplement — mBio. 2014 Jan 28;5(1):e01028-13. doi: 10.1128/mBio.01028-13 (PMC3903286; doi:10.1128/mbio.01028-13), 2014-01-28
Supplement: mbo001141710sf02.pdf [file mbo001141710sf02.pdf]

**Supplementary Figure 2 – Vector map of pDL993**

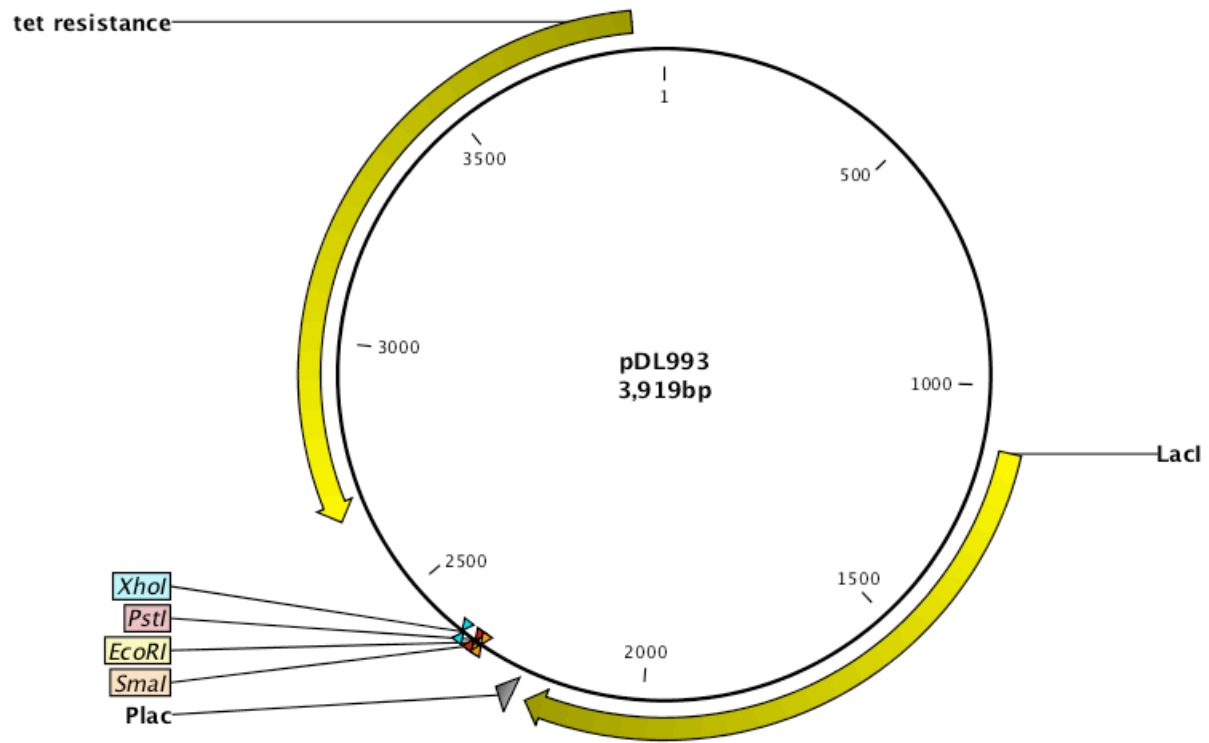

Vector map for the construct used to express the full-length *tfoS* gene in *E. coli*. The full-length *tfoS* gene was cloned into the EcoRI and XhoI sites in the multi-cloning site downstream of the IPTG inducible  $P_{lac}$  promoter.
