# Supplementary material for: Identification of a Membrane-Bound Transcriptional Regulator That Links Chitin and Natural Competence in Vibrio cholerae
Source: PubMed Central journal article supplement — mBio. 2014 Jan 28;5(1):e01028-13. doi: 10.1128/mBio.01028-13 (PMC3903286; doi:10.1128/mbio.01028-13), 2014-01-28
Supplement: mbo001141710st1.pdf [file mbo001141710st1.pdf]

**Supplementary Table 1** – Strains used in this study

| Strain name in manuscript            | Genotype and antibiotic resistance(s)                                       | Description                                                                                                                                                                                                                                           |
|--------------------------------------|-----------------------------------------------------------------------------|-------------------------------------------------------------------------------------------------------------------------------------------------------------------------------------------------------------------------------------------------------|
| WT                                   | E7946 SmR                                                                   | Wild type <i>V. cholerae</i> O1 El Tor                                                                                                                                                                                                                |
| $\Delta tfoS$                        | E7946 $\Delta tfoS$ SmR SpecR                                               | FRT-SPEC-FRT replacing <i>tfoS</i>                                                                                                                                                                                                                    |
| $\Delta$ periplasmic <i>tfoS</i>     | E7946 <i>lacZ</i> ::FRT-SPEC-FRT $\Delta$ periplasmic <i>tfoS</i> SmR SpecR | Disruption of the <i>lacZ</i> gene with FRT-SPEC-FRT and an unmarked in-frame deletion of the periplasmic domain of <i>tfoS</i>                                                                                                                       |
| $P_{tac-tfoX}$                       | E7946 $P_{tac-tfoX}$ SmR KanR                                               | The mTn10 overexpression cassette upstream of the endogenous copy of <i>tfoX</i> in the genome                                                                                                                                                        |
| $P_{tac-tfoX} \Delta tfoS$           | E7946 $\Delta tfoS P_{tac-tfoX}$ SmR KanR                                   | FRT scar replacing <i>tfoS</i> and the mTn10 overexpression cassette upstream of the endogenous copy of <i>tfoX</i> in the genome                                                                                                                     |
| $P_{tac-qstR}$                       | E7946 $P_{tac-qstR}$ SmR KanR                                               | The mTn10 overexpression cassette upstream of the endogenous copy of <i>qstR</i> in the genome                                                                                                                                                        |
| $P_{tac-qstR} \Delta tfoS$           | E7946 $\Delta tfoS P_{tac-qstR}$ SmR KanR                                   | FRT scar replacing <i>tfoS</i> and the mTn10 overexpression cassette upstream of the endogenous copy of <i>qstR</i> in the genome                                                                                                                     |
| $P_{tfoR-lacZ}$ TX                   | E79646 $\Delta VC1807 P_{tfoR-lacZ}$ SmR SpecR                              | FRT-SPEC-FRT replacing VC1807 (An out-of-frame transposase – i.e. a neutral gene deletion) and a transcriptional fusion of the $P_{tfoR}$ promoter to the endogenous copy of <i>lacZ</i> in the genome                                                |
| $\Delta tfoS P_{tfoR-lacZ}$ TX       | E7946 $\Delta tfoS P_{tfoR-lacZ}$ SmR SpecR                                 | FRT-SPEC-FRT replacing <i>tfoS</i> and a transcriptional fusion of the $P_{tfoR}$ promoter to the endogenous copy of <i>lacZ</i> in the genome                                                                                                        |
| <i>tfoX-lacZ</i> TL                  | E7946 $\Delta VC1807 tfoX-lacZ$ SmR SpecR                                   | FRT-SPEC-FRT replacing VC1807 (An out-of-frame transposase – i.e. a neutral gene deletion) and a translational fusion of the $P_{tfoX}$ promoter and first 13 amino acids of the <i>tfoX</i> gene to the endogenous copy of <i>lacZ</i> in the genome |
| $\Delta tfoS tfoX-lacZ$ TL           | E7946 $\Delta tfoS tfoX-lacZ$ SmR SpecR                                     | FRT-SPEC-FRT replacing <i>tfoS</i> and a translational fusion of the $P_{tfoX}$ promoter and first 13 amino acids of the <i>tfoX</i> gene to the endogenous copy of <i>lacZ</i> in the genome                                                         |
| <i>E. coli P<sub>tfoR-lacZ</sub></i> | MG1655 $P_{tfoR-lacZ}$ KanR                                                 | Contains a kanamycin resistance cassette (reverse orientation) and the $P_{tfoR}$ promoter (forward orientation) transcriptionally fused to the endogenous copy of <i>lacZ</i> in the genome                                                          |
