# Supplementary material for: Identification of a Membrane-Bound Transcriptional Regulator That Links Chitin and Natural Competence in Vibrio cholerae
Source: PubMed Central journal article supplement — mBio. 2014 Jan 28;5(1):e01028-13. doi: 10.1128/mBio.01028-13 (PMC3903286; doi:10.1128/mbio.01028-13), 2014-01-28
Supplement: mbo001141710st2.pdf [file mbo001141710st2.pdf]

**Supplementary Table 2 – Primers used in this study**

| Primer Name                     | Sequence (5' → 3')                                 | Description                                                                                                                   |
|---------------------------------|----------------------------------------------------|-------------------------------------------------------------------------------------------------------------------------------|
| <b>Mutant construct primers</b> |                                                    |                                                                                                                               |
| ABD123                          | ATTCCGGGGATCCGTCGAC                                | Forward primer to amplify FRT-SPEC-FRT or FRT-KAN-FRT (MIDDLE fragment for all deletion SOEs)                                 |
| ABD124                          | TGTAGGCTGGAGCTGCTTC                                | Reverse primer to amplify FRT-SPEC-FRT or FRT-KAN-FRT (MIDDLE fragment for all deletion SOEs)                                 |
| ABD640                          | GCAATACACGCTGTGTTTCACCG                            | $\Delta$ VC2080 or $\Delta$ periplasmic VC2080 ( <i>tfoS</i> ) UP F1                                                          |
| ABD641                          | gtcgacggatccccggaatCAATTCAAGAATTCGTGCTTTATTGG      | $\Delta$ VC2080 ( <i>tfoS</i> ) UP R1                                                                                         |
| ABD642                          | gaagcagctccagcctacaTAATAGAGCCCATCTCTATTTCATC       | $\Delta$ VC2080 ( <i>tfoS</i> ) DOWN F2                                                                                       |
| ABD643                          | TCGTTTTCTAAGGCTCGAATCGCC                           | $\Delta$ VC2080 or $\Delta$ periplasmic VC2080 ( <i>tfoS</i> ) DOWN R2                                                        |
| ABD726                          | GGTTAGCTGCCAATATCATTCTcacGAGTTCCCCTGTCAGCGAC       | $\Delta$ periplasmic VC2080 ( <i>tfoS</i> ) UP R1                                                                             |
| ABD727                          | GTCGCTGACAGGGGAACTCgtgAGAATGATATTGGCAGCTAACC       | $\Delta$ periplasmic VC2080 ( <i>tfoS</i> ) DOWN F2                                                                           |
| ABD744                          | GGAATAAAGGTTGCAACGGTTTG                            | $\Delta$ tfoR UP F1                                                                                                           |
| ABD745                          | gtcgacggatccccggaatCTTACATAGAAAAACGACAGCAGC        | $\Delta$ tfoR UP R1                                                                                                           |
| ABD746                          | gaagcagctccagcctacaCCTACTGTTTTACCTCTATTACCATC      | $\Delta$ tfoR DOWN F2                                                                                                         |
| ABD747                          | GCGCTGCTCAATTTTGATCAAC                             | $\Delta$ tfoR DOWN R2                                                                                                         |
| ABD253                          | GCGACCCACCGATGGG                                   | Construct to insert FRT-SPEC-FRT into <i>lacZ</i> UP F1                                                                       |
| ABD263                          | gtcgacggatccccggaatAACTGATCCAATTTTTTCAGCGCATATTTTG | Construct to insert FRT-SPEC-FRT into <i>lacZ</i> UP R1                                                                       |
| ABD262                          | gaagcagctccagcctacaTGCCGCAGGAAAACCGCCCCCTaATC      | Construct to insert FRT-SPEC-FRT into <i>lacZ</i> DOWN F2                                                                     |
| ABD256                          | CCCAAATACGGCAACTTGGCG                              | Construct to insert FRT-SPEC-FRT into <i>lacZ</i> DOWN R2                                                                     |
| ABD624                          | TGATGACGGTGAAAACCTCTGACAC                          | Overexpression cassette derived from the mTn10 transposon from pDL1093 MIDDLE F                                               |
| ABD625                          | CTGATGAATCCCCTAATGATTTTG                           | Overexpression cassette derived from the mTn10 transposon from pDL1093 MIDDLE R                                               |
| ABD688                          | CCACTGTTGCGCAGTTGAATACC                            | Overexpression of VC1153 ( <i>tfoX</i> ) UP F1                                                                                |
| ABD689                          | TGTCAGAGGTTTTACCGTCATCAATGCAATACTTTTGCGCCAGATTATG  | Overexpression of VC1153 ( <i>tfoX</i> ) UP R1                                                                                |
| ABD690                          | CAAATCATTAGGGGATTCATCAGGGGAAACGTGATTAAAGGATCAATGG  | Overexpression of VC1153 ( <i>tfoX</i> ) DOWN F2                                                                              |
| ABD691                          | ATGATGTCAAACCATGAACCCGG                            | Overexpression of VC1153 ( <i>tfoX</i> ) DOWN R2                                                                              |
| ABD692                          | TCTCCAGTAACTCCGATCCTAGTAG                          | Overexpression of VC0396 ( <i>qstR</i> ) UP F1                                                                                |
| ABD693                          | TGTCAGAGGTTTTACCGTCATCAATAGATTTTGGCGCTATGCG        | Overexpression of VC0396 ( <i>qstR</i> ) UP R1                                                                                |
| ABD694                          | CAAATCATTAGGGGATTCATCAGAAGTCTGTAATTCATCATGC        | Overexpression of VC0396 ( <i>qstR</i> ) DOWN F2                                                                              |
| ABD695                          | ACCATCTGACTGATGGTTTGCG                             | Overexpression of VC0396 ( <i>qstR</i> ) DOWN R2                                                                              |
| ABD398                          | GCAGCAACATCTCATTGGGTGGTG                           | $P_{tfoR}$ - <i>lacZ</i> transcriptional fusion OR <i>tfoX</i> - <i>lacZ</i> translational fusion in <i>V. cholerae</i> UP F1 |

|                                       |                                                                                |                                                                                                                        |
|---------------------------------------|--------------------------------------------------------------------------------|------------------------------------------------------------------------------------------------------------------------|
| ABD784                                | TTTTTCTATTTCTGAATCGATTTCATACGATTGCC                                            | $P_{tfoR}$ - <i>lacZ</i> transcriptional fusion OR <i>tfoX-lacZ</i> translational fusion in <i>V. cholerae</i> UP R1   |
| ABD780                                | TCGTATGAATCGATTTCAGAAATAGAAAAATAAAATCAACACCTTAAAAACA<br>TGATTAAGC              | $P_{tfoR}$ - <i>lacZ</i> transcriptional fusion in <i>V. cholerae</i> MIDDLE F                                         |
| ABD781                                | CCCTCAAGCCGAGGAGTAAAGAAGGACATGGTCATACCACCTCTGG                                 | $P_{tfoR}$ - <i>lacZ</i> transcriptional fusion in <i>V. cholerae</i> MIDDLE R                                         |
| ABD785                                | CTTCTTTACTCCTCGGCTTGAG                                                         | $P_{tfoR}$ - <i>lacZ</i> transcriptional fusion in <i>V. cholerae</i> DOWN F2                                          |
| ABD399                                | AACTGATGGCAGAAAAAGCCACTCAG                                                     | $P_{tfoR}$ - <i>lacZ</i> transcriptional fusion OR <i>tfoX-lacZ</i> translational fusion in <i>V. cholerae</i> DOWN R2 |
| ABD786                                | CGCAACTTCTCCGATATTCTTCTTAGCC                                                   | <i>tfoX-lacZ</i> translational fusion in <i>V. cholerae</i> DOWN F2                                                    |
| ABD782                                | GGCAATCGTATGAATCGATTTCAGAAATAGAAAAATAATCTGGCGCAAAAAGT<br>ATTGCATC              | <i>tfoX-lacZ</i> translational fusion in <i>V. cholerae</i> MIDDLE F                                                   |
| ABD783                                | GCTAAGAAGAATATCGGAGAAGTTGCGAGTTACGTAGTCGAAAACTGTTG                             | <i>tfoX-lacZ</i> translational fusion in <i>V. cholerae</i> MIDDLE R                                                   |
| mhpr-<br>kanTER                       | CGCAGGCTATTCTGGTGCCGGAAGGCGAAGCGGCATGCATTTACGTTGAT<br>TAGAAGAAGCTCGTCAAGAAGGCC | $P_{tfoR}$ - <i>lacZ</i> fusion recombineering construct for <i>E. coli</i> UP F1                                      |
| ABD779                                | CGCAAGGGCTGCTAAAGGAAG                                                          | $P_{tfoR}$ - <i>lacZ</i> fusion recombineering construct for <i>E. coli</i> UP R1                                      |
| ABD777                                | CTTCCTTTAGCAGCCCTTGCGTAAAATCAACACCTTAAAAACATGATTAAGC                           | $P_{tfoR}$ - <i>lacZ</i> fusion recombineering construct for <i>E. coli</i> DOWN F2                                    |
| ABD778                                | CAGTCACGACGTTGTAAAACGACGGCCAGTGAATCCGTAATCATGGTCATG<br>ACATGGTCATACCACCTCTGG   | $P_{tfoR}$ - <i>lacZ</i> fusion recombineering construct for <i>E. coli</i> DOWN R2                                    |
| <b>EMSA probes</b>                    |                                                                                |                                                                                                                        |
| ABD009                                | TATATGCCTTTAGGCATTAAGTACTTCCGTC                                                | $P_{nanH}$ F                                                                                                           |
| ABD010                                | TGAAGTCATCTTGATTGACAAGTCTCCATCGAATG                                            | $P_{nanH}$ R                                                                                                           |
| ABD748                                | TAAAATCAACACCTTAAAAACATGATTAAGC                                                | $P_{tfoR}$ F                                                                                                           |
| ABD700                                | AAAAAATATCGTGGTATAGCCGG                                                        | $P_{tfoR}$ R                                                                                                           |
| ABD750                                | TAATCTGGCGCAAAAAGTATTGCATC                                                     | $P_{tfoX}$ F                                                                                                           |
| ABD751                                | TTACGTAGTCGAAAAACTGTTGC                                                        | $P_{tfoX}$ R                                                                                                           |
| <b>qRT-PCR primers</b>                |                                                                                |                                                                                                                        |
| ABD132                                | CTGTCTCAAGCCGGTTACAA                                                           | <i>rpoB</i> F                                                                                                          |
| ABD133                                | TTTCTACCAGTGCAGAGATGC                                                          | <i>rpoB</i> R                                                                                                          |
| ABD711                                | TTTTTGTGCGTGGTGGAGAAGAGC                                                       | <i>tfoX</i> F                                                                                                          |
| ABD712                                | AGTCTAGCTCAGGGTGATGTTGCTC                                                      | <i>tfoX</i> R                                                                                                          |
| ABD713                                | TGTTTCTTTCTCTCTGCCTGCCG                                                        | <i>comEA</i> F                                                                                                         |
| ABD714                                | GCCTTTGAGTAACGTCGCCAGC                                                         | <i>comEA</i> R                                                                                                         |
| ABD736                                | TACGGAGGAAATTATGAAAGCG                                                         | <i>pilA</i> F                                                                                                          |
| ABD737                                | CTAAGCCAACCCCAATAGCTG                                                          | <i>pilA</i> R                                                                                                          |
| <b>Primers for plasmid constructs</b> |                                                                                |                                                                                                                        |
| ABD721                                | catgtatacataTGACAAGAATGATATTGGCAGCTAACC                                        | Cytoplasmic portion of <i>tfoS</i> F                                                                                   |

|        |                                            |                                      |
|--------|--------------------------------------------|--------------------------------------|
| ABD722 | tacgataggatccTTAGTTTTCTTGATCTTCGATGAATTGGC | Cytoplasmic portion of <i>tfoS</i> R |
| ABD787 | tatataggatccCCAATAAAGCACGAATTCTTGAATTG     | Full length <i>tfoS</i> F            |
| ABD788 | tatatactcgagTTAGTTTTCTTGATCTTCGATGAATTGGC  | Full length <i>tfoS</i> R            |
